# Supplementary material for: Non-formal chemistry learning: a scoping review
Source: publisher site journal article supplement (doi:10.1515/cti-2025-0020), 2025-07-04
Supplement: Supplementary file 1 [file j_cti-2025-0020_suppl_001.docx]

**Informal Chemistry Learning: A Scoping Review**

Megan J. D’Alton, Patrick I. T. Thomson and Fraser J. Scott*

Department of Pure and Applied Chemistry, University of Strathclyde, Glasgow, U.K., G1 1XL

*****E-mail: [fraser.j.scott@strath.ac.uk](mailto:fraser.j.scott@strath.ac.uk)

*Initial Analysis of Literature*

|  | **Authors** | **Title** | **Summary** | **Central Ideas** |
| --- | --- | --- | --- | --- |
| 1 | J. Ahn *et al* | Seeing the Unseen Learner: Designing and Using social media to Recognise Children’s Science Disposition in Action | Development of an app used at a summer camp to allow student to share their thoughts and observation while participating in science experiments. | - Use of social media in learning and teaching. - Social and cultural practices important for science learning. - Utilising science in everyday lives. - Development of students engagement throughout an activity. |
| 2 | A. Anderson *et al* | Design Strategies for Hands-On Activities to Increase Interest, Relevance and Self-Efficacy in Chemistry | Does the content and format of chemistry hands on activities change the attitudes of science museum visitors. | - Content vs. Format for activities - Design based research - Under representation of chemistry - Public attitudes of chemistry. |
| 3 | A. Aslan *et al* | Academics’ Perspectives on Out-of-School Learning Environments | Case study of 56 academics from different science backgrounds investigating their opinion and ability to plan informal learning activities. | - Importance of interdisciplinary learning. - Variation of informal learning environments. - Preferred subjects for science informal learning - Attitudes, difficulties and benefits stated of informal learning. |
| 4 | M. Beeken *et al* | Pub Science – The Long Nights of Experiments: Students Present Chemical Experiments in Dining Facilities | Students plan, carry out and reflect on chemistry demonstrations they presented to the general public. | - Improving self-concept of chemistry in students. - Motivation and interest in chemistry. - ‘unusual’ science communication environments. - Public attitudes to chemistry. |
| 5 | D. A. Boyd | Safer and Greener Polymer Demonstrations for STEM Outreach | Methods for alternative polymer outreach in replacement of Borax slime. | - Educational value and enjoyment from chemistry demonstrations. - Purpose of chemistry demonstrations (polymers) - Making chemistry demonstrations safe is possible. |
| 6 | C. L. Brown *et al* | Writing Without Ink: A Mechanically and Photochemically Responsive PDMS Polymer for Science Outreach | Method for colour changing polymer activity which can be conducted in an outreach environment. | - Making chemistry demonstrations safe. - Benefits of live science demonstrations. |
| 7 | M. K. Brown *et al* | Bringing Organic Chemistry to the Public: Structure and Scent in a Science Museum | Evaluation of an organic chemistry exhibit in a science museum connecting scents and molecules. | - Exhibit design - Public attitudes to chemistry - Exhibit interaction - Chemistry in museums - People's senses |
| 8 | M. Budke *et al* | Empirical Study of the Effects of Stationary and Mobile Student Laboratories: How Successful are Mobile Student Laboratories in Comparison to Stationary Ones at Universities | If students cannot attend extracurricular locations, can a mobile laboratory be equally effective in increasing motivation in students. | - Student laboratories supporting science learning - Motivations of students - Scientific literacy - Perceptions of science - Influence of place of learning - Activity design - Positive and negative emotions towards science |
| 9 | R. Burks *et al* | When Science Intersects Pop Culture: An Informal Science Education Outreach Program | Review of chemistry themed talks through pop culture to engage the general public. | - Open ended questions in surveys - Use of interactive aspects to engage learners - Combining science with entertainment - Why people engage with science - Gender gap in science engagement |
| 10 | B. K. DeKorver *et al* | Exploration of a Method to Assess Children’s Understanding of a Phenomenon After Viewing a Demonstration Show | Comparing two demonstration shows with different formats to evaluate understanding of key chemical concepts. | - Impact/use of chemical demonstrations - Importance of questioning for learning - Learning outcomes in informal settings - Difficulties of assessments informally |
| 11 | J. F. Dewilde *et al* | Evaluating Large Scale STEM Outreach Efficiency with a Consistent Theme: Thermodynamics for Elementary School Students | Achievement of learning outcomes of children at a science show using preshow and postshow questioning. | - Assessing learning in informal environments - Ability to foster curiosity - Promotion of scientific interest - Process of choosing topic for science engagement - Use of specific words to impact learning |
| 12 | V. Domenici | STEAM Project-Based Learning Activities at a Science Museum as an Effective Training for Future Chemistry Teachers | Trainee teachers planning, developing and doing informal learning activities at a science museum. | - Chemistry teachers in non formal environments - Theory of teaching methologies - Science museum impact on chemistry learning - Making chemistry relevent |
| 13 | J. Donelly *et al* | Fusing a Reversed and Informal Learning Scheme and Space: Student Perceptions of Active Learning in Physical Chemistry | Study of students’ perceptions of a physical chemistry course when it is redesigned to an active learning model. | - Attitudes to chemistry - Taking responsibility for own learning - Impact discussions have on learning and evaluations |
| 14 | C. Flener-Loyitt | Using the Socioeconomic Context of Climate Change to Teach Chemical Content and Nature of Science | Non-STEM university students used critical thinking and address misconceptions of climate change with science centre staff. | - Connecting with non-STEM specialists - Addressing misconceptions in chemistry - Creation of training documents to support informal learning - Critical thinking skills - Application of science to everyday life - Intersiciplinary learning |
| 15 | E. C. Heider *et al* | Integrating Informal Learning in College General Chemistry Courses | University course allows students to aid their formal chemistry learning with informal learning in an art gallery. | - Overlap of formal and informal - Motivation - Using theoretical framework to support research - Practicality of visiting ILEs (socioeconomic) - Inequitable - Challenges associated with implementation - Testing for effectiveness (measures) - Successful vs unsuccessful |
| 16 | L. K. Hobbs | Engaging Young Carers with Science Through Textile Based Crafts | Using underlying chemistry concepts in making textiles to informally teach young carers. | - Developing science capital - Social development with informal learning - Barriers to participating in informal learning |
| 17 | L. K. Hobbs | Play-Based Science Learning Activities Engaging Adults and Children with Informal Learning with Pre-Schoolers | Outreach project for pre-schoolers and their accompying adults to aid discovery of the world. | - The role of parents in supporting informal learning - Choice of environments for learning activities - Varying definitions of “science” between people. - Informal science learning for younger audiences |
| 18 | E. L. Howell *et al* | Communicating Chemistry Through cooking and Personal Health: Everyday Applications Increase Perceived Relevance, Interest and Self-Efficacy in Chemistry | Designed experiments in collaboration with museums to test effects of different chemistry concepts. | - Importance of different content on engagement - Challenges in communicating chemistry - Importance of interest, relevance and self efficacy - Personal relevance vs societal relevance |
| 19 | H. Itzek-Grulich *et al* | Effects of a Science Center Outreach Lab on Students’ Achievement. Are Student Lab Visits Needed When They Teach What Students Can Learn at School? | Using pre and post test data to analyse the impact of high school students participating in an outreach lab. | - Importance of environment for informal learning - Measuring achievement as a parameter for a successful activity - Using active learning to support classroom collaboration and learning |
| 20 | H. Itzeck-Grulich *et al* | Effectiveness of Lab-Work Learning Environments in and Out of School: A Cluster Randomized Study | Comparison of emotions of different interactions with different learning environments. | - Emotions associated with a laboratory environment - Aspects of increasing students motivation and interest - Importance of hands on connection with science |
| 21 | H. Itzeck-Grulich *et al* | Emotional and Motivational Outcomes of Lab Work in the Secondary Intermediate Track: The Contribution of a Science Center Outreach Lab | Engaging high school students with labs involving chemistry in their everyday lives. | - Demographic analysis in connecting with student interest/emotions - Emotions exhibited by participating in informal learning/laboratory environments - Inquiry based learning to promote motivation or interest |
| 22 | H. W. Kerby *et al* | Demonstrating Show That Promotes and Assesses Conceptional Understanding Using the Structure of Drama | Investigation in conceptual understanding from general public during a science show. | - Cognitive/learning from a demonstration show. - Importance of audience’s desire to learn - Increasing positive attitudes in science - Embedding assessment into informal learning - Purpose of informal learning |
| 23 | E. K. Kollmann *et al* | Collaboration For Chemistry Communication: Insights from a Research-Practice Partnership | A multi-year collaboration report to understand how best to communicate chemistry to the public. | - Collaboration between museum groups and university groups to enhance science communication - Enhancement of public engagement with chemistry - Utilisation of online resources to enhance science outreach |
| 24 | T. S. Kuntzleman *et al* | Constructing an Annotated Periodic Table Created with Interlocking Building Blocks: A National Chemistry Week Outreach Activity for All Ages | Construction of a Lego periodic table with the general public to promote chemistry discussion. | - Importance of discussion for informal chemistry education |
| 25 | A. J. Macbeth *et al* | Engaged Food Science: Connecting K-8 Learners to Food Science While Engaging Graduate Students in Science Communication | Methods for six activities communicating chemistry to school students by graduate students at a science museum. | - Importance of proper communication for science learning - Public engaging with current science issues - Ability to adapt activities to different audiences and environments - Benefits of science engagement/communication - Personal, professional and societal gains of informal learning activities |
| 26 | M. B. McClure *et al* | A Pedagogical Approach to Science Outreach | Presents an approach to a flexible science outreach program which uses a pedagogical approach at the foundation. | - Encouragement important for engagement - Benefits of informal chemistry learning - Adapting activities to different environments - Steps in delivering a successful program/science communication |
| 27 | B. Mernoff *et al* | A Reverse Science Fair Which Connects High School Students with University Researchers | High school students presents their own research to professionals in an informal environment. | - Establishing relationships and role models between students and scientists - Creating enthusiasm around science - Understanding and interest for engagement - Importance of environment for engagement |
| 28 | C. Morais | Storytelling With Chemistry and Related Hands-On Activities: Informal Learning Experiences to Prevent Chemophobia and Promote Young Children’s Scientific Literacy | For primary students to read a story and then do an activity related to that. Show their experiences by drawing. | - Common views of chemistry or scientists - Analysis of young children interpretations through drawings and observations - Promoting scientific literacy for all |
| 29 | B. Schluter | Everybody Wants to Experiment: Assessing Motivation to Participate in a Chemistry Family Learning Course | Using a family chemistry course to research what motivates children and their parents to participate. | - Social aspects of informal learning - Aided by an instructor - Motivation – different target audiences (similarities and differences) - Evaluation by post survey data - Why pre data should be considered - Personal factors to facilitate participation - Common evaluation methods – counts, antidotes and surveys |
| 30 | C. Tosun | Scientific Process Skills Test Development Within the Topic “Matter and Its Nature” and the Predictive Effect of Different Variables | Investigating if out of school experiences have an effect on student’s science processing skills. | - Basic aims of science – gathering, processing and generating evidence - Promoting science literacy - Impact of demographic features on learning and engagement |
| 31 | E. S. Urvalakova *et al* | Citizen Science – Bridging the Gap Between Scientists and Amateurs | A review of a technique where amateur scientists take on a volunteer research role, supported by professionals. | - Emphasis on being part of a team - Lifelong learning possibilities - Importance of collaboration - Ability to take on an active role in science |
| 32 | C. L. Wickware *et al* | The Science of the Sundae: Using Principle Colligative Properties of Food Science Outreach in Middle and High School Students | Method of activities adaptable to an age range using the theme of a sundae in a workshop environment. | - Adapting activities for multiple ages and environments - Using chemistry language in appropriate way to not inhibit learning - Establishing learning outcomes in informal environments. |
| 33 | M. Y. Yang *et al* | Kitchen Matters: Virtual Materials Science Outreach Through Food and Cooking | Virtual program which explores chemistry in your own kitchen with the general public. | - Adapting science outreach to an online environment - Redesign of activities for inclusivity - “Good” science outreach attributes |
| 34 | D. M. Zhilin | Experience of Introducing 8-10 y.o. to Chemistry | Introduced children to complicated hands-on activity in a workshop at the science museum and evaluated success. | - Cognitive development theories - Deciding how and what to teach - Parents say in wanting their child to learn chemistry - Targeted skills and outcomes at this age |
