# Supplementary material for: Non-formal chemistry learning: a scoping review
Source: publisher site journal article supplement (doi:10.1515/cti-2025-0020), 2025-07-04
Supplement: Supplementary file 2 [file j_cti-2025-0020_suppl_002.docx]

**Non-Formal Chemistry Learning: A Scoping Review**

Megan J. D’Alton, Patrick I. T. Thomson and Fraser J. Scott*

Department of Pure and Applied Chemistry, University of Strathclyde, Glasgow, U.K., G1 1XL

*****E-mail: [fraser.j.scott@strath.ac.uk](mailto:fraser.j.scott@strath.ac.uk)

**Future Work**

In line with the purpose of a scoping review, we present below potential research questions that the community should consider for further work. These have been listed approximately in the sequence they arose in the paper, in an attempt to reduce author biases that may be introduced by an alternative ordering.

1. Why is non-formal *chemistry* learning under-represented in the literature?

2. Why are science museums well-represented in the literature as locations for non-formal chemistry learning? What specific benefits and drawbacks do science museums afford to non-formal chemistry learning?

3. Which unconventional locations, such as art galleries and pubs, can be used for non-formal chemistry learning. How effective are these locations and do they contribute to the equity of access or reach of non-formal chemistry learning?

4. Why are there limited non-formal chemistry learning studies in the literature relating to television and online media, such as YouTube? Are these formats suitable for effective non-formal chemistry learning?

5. Are participants of non-formal chemistry learning, particularly the general public, already interested (or other suitable affective-motivational factor) in chemistry? And therefore, does non-formal chemistry learning actually reach an appropriate audience?

6. To what extent is the access to non-formal chemistry learning equitable across diverse participant demographic groups?

7. How does the format of a non-formal chemistry learning activity affect its effectiveness?

8. How does the duration of a non-formal chemistry learning activity affect its effectiveness?

9. Are non-formal chemistry learning activities evaluated, and is this evaluation appropriate? Is this evaluation reported such that best-practices are shared?

10. Why do most reported non-formal chemistry learning activities focus their evaluations on the understanding of chemistry, rather than a factor that is better aligned with the purpose of non-formal learning?

11. What is the best measurement schedule (pre-, during-, post- etc.) for evaluations of non-formal chemistry learning? And to what extent does a long-term measurement provide a better measure of the effectiveness towards the goals of non-formal learning?

12. To what extend do the experiences of organisers affect non-formal chemistry learning activities?

13. In what way does flexibility within the design and running of non-formal chemistry learning activities contribute to their effectiveness and inclusivity?

14. In what way does literacy (both general and scientific) affect the effectiveness and inclusivity of non-formal chemistry learning?

15. To what extent does each affective-motivational factor affect engagement with non-formal chemistry learning activities?

16. What level of affective-motivational factors do participants of non-formal chemistry learning activities initially possess? Does this vary between different demographic groups?

17. To what extent does engagement in non-formal chemistry learning bring about sustained changes in affective-motivational factors?

18. To what extent does the format of a non-formal chemistry learning activity affect its effectiveness? And is this uniform across different demographic groups?
